## **Cooperative regulation of C1-domain membrane recruitment polarizes atypical Protein Kinase C**

Kimberly A. Jones\*, Michael L. Drummond\*, and Kenneth E. Prehoda

Institute of Molecular Biology  
Department of Chemistry and Biochemistry  
1229 University of Oregon  
Eugene, OR 97403

\*Equal contributions

Corresponding author: [prehoda@uoregon.edu](mailto:prehoda@uoregon.edu)

## 1 **Abstract**

2 Recruitment of the Par complex protein atypical Protein Kinase C (aPKC) to a specific  
3 membrane domain is a key step in the polarization of animal cells. While numerous proteins  
4 and phospholipids interact with aPKC, how these interactions cooperate to control its  
5 membrane recruitment has been unknown. Here we identify aPKC's C1 domain as a  
6 phospholipid interaction module that targets aPKC to the membrane of *Drosophila* neural stem  
7 cells (NSCs). The isolated C1 binds the NSC membrane in an unpolarized manner during  
8 interphase and mitosis and is uniquely sufficient among aPKC domains for targeting. Other  
9 domains, including the catalytic module and those that bind the upstream regulators Par-6 and  
10 Baz, restrict C1's membrane targeting activity spatially and temporally – to the apical NSC  
11 membrane during mitosis. Our results suggest that Par complex polarity results from  
12 cooperative activation of autoinhibited C1 membrane binding activity.

## 13 **Introduction**

14 The Par complex polarizes animal cells by excluding specific cortical factors from the Par  
15 cortical domain (Lang and Munro, 2017; Venkei and Yamashita, 2018). During polarization the  
16 Par complex, consisting of Par-6 and atypical Protein Kinase C (aPKC), is recruited to a  
17 specific, continuous region of the cell membrane such as the apical surface of epithelia  
18 (Tepass, 2012), the anterior hemisphere of the *C. elegans* zygote (Nance and Zallen, 2011), or  
19 the apical hemisphere of *Drosophila* neural stem cells (NSCs) (Prehoda, 2009). Factors that are  
20 polarized by the Par complex, such as Miranda and Numb, are aPKC substrates (Atwood and  
21 Prehoda, 2009; Smith et al., 2007). Phosphorylation is coupled to removal from the Par  
22 domain, causing these substrates to form a complementary membrane domain (Bailey and  
23 Prehoda, 2015). Thus, the pattern of Par-polarized factors is ultimately determined by the  
24 mechanisms that specify aPKC's membrane recruitment and activation.

25 Many aPKC interactions with proteins and phospholipids have been identified (Figure 1A),  
26 although how they collaborate to polarize aPKC remains poorly understood. Bazooka (Baz aka  
27 Par-3) and Par-6 form direct physical contacts with aPKC and each protein has possible  
28 pathways for membrane recruitment, Baz through direct interactions with the membrane and  
29 Par-6 through interactions with prenylated Cdc42 (Joberty et al., 2000; Lin et al., 2000; Krahn  
30 et al., 2010). Several direct interactions with phospholipids have also been reported, including  
31 with ceramide (Wang et al., 2005), sphingosine 1-phosphate (Kajimoto et al., 2019), and the  
32 phosphoinositides PI (4,5)P<sub>2</sub>, and PI (3,4,5)-P<sub>3</sub> (Standaert et al., 1997). The aPKC catalytic

33 domain may also play a role in membrane recruitment as perturbations in this domain can  
34 cause aPKC to become depolarized (i.e. localized uniformly to the membrane) (Rodriguez et al.,  
35 2017; Hannaford et al., 2019).

36 While interactions that could potentially recruit aPKC to the membrane have been identified,  
37 what is missing is an understanding of how the interactions function together to yield aPKC  
38 polarity. One possibility is that each interaction is weak, unable to recruit aPKC to the  
39 membrane on its own, but the energy provided by multiple weak interactions allows for  
40 recruitment (i.e. avidity). Alternately, one or more interactions could be responsible for  
41 recruitment but somehow regulated to ensure that targeting only occurs when the appropriate  
42 cues are present. These models could be distinguished by determining if any interactions lead  
43 to constitutive membrane recruitment (i.e. if one or more domains were sufficient for targeting).

44 We used *Drosophila* NSCs to investigate how aPKC is recruited to the membrane during  
45 polarization (Homem and Knoblich, 2012). During NSC interphase, aPKC is cytoplasmic but  
46 becomes targeted to the apical hemisphere early in mitosis, ultimately concentrating near the  
47 apical pole before depolarizing and returning to the cytoplasm as division completes (Oon and  
48 Prehoda, 2019). The highly dynamic nature of the NSC polarity cycle makes it possible to  
49 assess both spatial (polarized, depolarized, or cytoplasmic) and temporal (interphase or  
50 mitotic) aspects of aPKC membrane recruitment regulation.

## 51 **Results**

### 52 **Mutations that inactivate catalytic activity depolarize aPKC**

53 We began our examination of aPKC membrane targeting mechanisms in NSCs by evaluating  
54 the role of the catalytic domain. At metaphase, aPKC is highly enriched at the apical  
55 membrane of larval brain NSCs (Rolls et al., 2003). We examined the effect of mutations that  
56 inactivate aPKC's catalytic activity on its localization in cells that lacked endogenous aPKC  
57 (*apkc*<sup>K06403</sup> in positively marked clones; Lee and Luo, 1999). Besides aPKC's localization, we  
58 also examined its activity in these NSCs by determining the localization of Miranda (Mira), an  
59 aPKC substrate that is normally restricted to the basal cortex by apical aPKC activity (Figure  
60 1B) (Atwood and Prehoda, 2009; Ikeshima-Kataoka et al., 1997). Consistent with previous  
61 observations, we found that in metaphase *apkc*<sup>K06403</sup> NSCs, Mira was allowed to enter the  
62 apical cortex becoming uniformly cortical (Figure 1B). Furthermore, expression of wild-type

63 aPKC restored the apical aPKC and basal Mira localization found in normally functioning NSCs  
64 to *aPKC*<sup>K06403</sup> null clones (Figure 1B, Holly et al., 2020).

65 To examine the effect of perturbing catalytic activity, we expressed aPKC harboring a mutation  
66 (D388A) that does not have detectable activity in an *in vitro* protein kinase assay (Holly et al.,  
67 2019). This mutation is in a residue that coordinates the  $\gamma$ -phosphate of ATP and is thought to  
68 prevent phosphotransfer while allowing ATP to bind (Cameron et al., 2009). Unlike wild-type  
69 aPKC, which is restricted to the apical domain at metaphase, we found that aPKC D388A was  
70 largely depolarized, localizing to the entire cortex of *aPKC*<sup>K06403</sup> metaphase null clones (Figure  
71 1A). Mira also localized uniformly to the cortex in these cells, confirming that aPKC D388A is  
72 inactive both *in vitro* (Holly et al., 2019) and *in vivo* (Figure 1B-F). Interestingly, the kinase  
73 inactivating mutation also caused aPKC to associate with the membrane during interphase, a  
74 cell cycle period in which it is normally cytoplasmic (Figure 1D,F). We conclude that inactivation  
75 of the aPKC catalytic domain causes aPKC to constitutively localize to the membrane.

#### 76 **Kinase inactive aPKC's localization is not restored by endogenous aPKC**

77 Our results indicate that mutations that perturb aPKC's catalytic activity also influence its  
78 localization, both spatially and temporally, leading to constitutive depolarization. Previous  
79 observations using chemically inhibited aPKC also found that perturbations to catalytic activity  
80 caused depolarization (Rodriguez et al., 2017; Hannaford et al., 2019). The depolarization  
81 caused by perturbations to the kinase domain could be explained if aPKC's catalytic activity  
82 directly participated in its own localization (e.g. by activating an upstream regulator via  
83 phosphorylation). Alternately, however, perturbations in the kinase domain could alter other  
84 aPKC functions. Besides catalyzing phosphotransfer, the aPKC kinase domain also binds a  
85 pseudosubstrate in its NH<sub>2</sub>-terminal region causing autoinhibition (Graybill et al., 2012).  
86 Mutations or small molecules that influence the active site could perturb the intramolecular  
87 interaction in addition to inhibiting catalytic activity. To determine whether the loss of aPKC's  
88 catalytic activity is responsible for the localization defects of D388A aPKC, we determined  
89 whether the presence of wild-type, endogenous aPKC with its normal level of catalytic activity  
90 could restore aPKC D388A polarity. We also tested the localization of a well-studied kinase  
91 inactive mutation K293W, which blocks ATP binding (Graybill et al, 2012). In NSCs containing  
92 endogenous aPKC, both aPKC D388A and K293W remained depolarized indicating that aPKC  
93 catalytic activity is not sufficient to restore polarity to these proteins. Interestingly, in cells  
94 expressing aPKC K293W Mira polarity was restored, confirming that aPKC activity was

95 present, but in cells expressing aPKC D388A, Mira remained depolarized suggesting that aPKC  
96 D388A influences the localization or activity of endogenous aPKC (Figure 1C).

97 We also examined whether kinase inactive aPKC mutants influence the localization of Baz or  
98 Par-6, proteins that directly interact with aPKC. We found that Baz remained apically polarized  
99 in cells expressing aPKC, as well as those expressing the aPKC D388A or aPKC K293W  
100 variants, although the intensity of this crescent was slightly reduced in aPKC D388A (Figure 2A,  
101 C). While Baz localization was unperturbed by the expression of the kinase inactive aPKC  
102 variants, Par-6 expanded into the basal domain like the localization of aPKC D388A and aPKC  
103 K293W (Figure 2A, B). This pattern of localization is similar to that of an analog sensitive variant  
104 of aPKC that also caused depolarization of Par-6 but not Baz (Hannaford et al., 2019). We  
105 conclude that expression of kinase inactive aPKC leads to loss of Par-6 polarity but does not  
106 influence the localization of Baz.

#### 107 **Kinase inactive aPKC binds the NSC membrane independent of Cdc42 and Bazooka**

108 Membrane targeting of aPKC normally requires the activity of Baz and the small GTPase  
109 Cdc42 (Wodarz et al., 2000; Rolls et al., 2003; Atwood et al., 2007). We tested whether these  
110 upstream regulators are required for the uniformly cortical localization of kinase inactive aPKC  
111 by examining the localization of aPKC K293W in NSCs expressing Baz or Cdc42 RNAi. We  
112 found that wild-type aPKC failed to recruit to the membrane in these contexts, as previously  
113 reported (Figure 3A-D) (Atwood et al., 2007; Rolls et al., 2003). Consistent with this  
114 observation, we found that Mira was depolarized, localizing uniformly to the cortex in these  
115 cells. In contrast to wild-type aPKC, however, aPKC K293W was able to remain on the cortex  
116 even when Cdc42 was absent (Figure 3A-B). We also examined the localization of aPKC and  
117 the K293W variant in NSCs expressing Baz RNAi. In this context, wild-type aPKC appears  
118 more cytoplasmic and Mira becomes depolarized as expected (Atwood et al., 2007). Like  
119 NSCs expressing Cdc42 RNAi, however, aPKC K293W's cortical localization was not affected  
120 when Baz was reduced (Figure 3C-D). We conclude that aPKC K293W does not rely on Cdc42  
121 or Baz for cortical targeting.

#### 122 **The aPKC C1 domain is a constitutive membrane targeting module**

123 Our results indicate that the uniform membrane localization of aPKC with inactive kinase  
124 domains (e.g. K293W) is independent of both Baz and Cdc42. One model consistent with  
125 these results is that aPKC contains a membrane targeting module that is regulated by its

126 kinase domain, Baz, and Cdc42. To identify the putative module, we first examined whether  
127 removing the kinase domain leads to the same uniform membrane localization phenotype. As  
128 shown in Figure 4B, D-E, aPKC PB1-C1 (i.e.  $\Delta$ KD) was uniformly localized in NSCs. A similar  
129 localization pattern has been reported for aPKC PB1-C1 expressed in cultured cells (Dong et  
130 al., 2020). Thus, aPKC's NH<sub>2</sub>-terminal regulatory region contains the domain responsible for  
131 membrane binding. The regulatory region has three domains, PB1, PS and C1, each of which  
132 has the potential to interact with the membrane. The PB1 could mediate interaction with the  
133 membrane via protein-protein interactions with Par-6 (Atwood et al., 2007; Petronczki and  
134 Knoblich, 2001), the PS domain through direct interactions with lipids (Dong et al., 2020), and  
135 the C1 which serves as a membrane targeting module in other PKCs (Colón-González and  
136 Kazanietz, 2006), but has not been reported to do so in aPKCs. Removal of the C1 domain  
137 from the regulatory domain (aPKC PB1-PS) leaving the PB1 and PS domains, resulted in a  
138 protein that was not enriched at the membrane (Figure 4). Thus, the C1 domain is required for  
139 membrane localization of the regulatory region – the PB1 and PS domains are not sufficient for  
140 membrane targeting in NSCs. We next tested the C1 domain alone and found that it is  
141 sufficient for uniform targeting to the membrane (Figure 4B-D). During interphase the C1  
142 domain was bound to membrane but also highly nuclear enriched (Figure 4C). Thus, the aPKC  
143 C1 domain is a membrane targeting module.

#### 144 **C1 is a lipid binding module that is required for aPKC membrane recruitment**

145 How might the C1 domain mediate interaction with the NSC membrane? C1 domains in  
146 canonical PKCs bind diacylglycerol, and although the aPKC C1 domain does not bind DAG  
147 (Colón-González and Kazanietz, 2006), we sought to determine if it binds other phospholipids.  
148 We used a vesicle pelleting assay in which Giant Unilamellar Vesicles (GUVs) with varying  
149 phospholipid compositions were mixed with purified aPKC C1 domain. The vesicles were  
150 separated from the soluble phase by ultracentrifugation and any associated C1 was identified  
151 by protein gel electrophoresis. As shown in Figure 5A, we observed varying degrees of C1  
152 binding to a broad array of phospholipids, suggesting that the C1 is a nonspecific phospholipid  
153 binding module.

154 To better understand the role of the C1 in aPKC polarity, we examined the effect of removing it  
155 (aPKC  $\Delta$ C1) on aPKC's localization. As shown in Figure 4B-E, we found that aPKC  $\Delta$ C1  
156 remained in the cytoplasm, failing to bind the membrane. We conclude that the C1 is required  
157 for aPKC membrane targeting in NSCs. Interestingly, Mira localization was also disrupted in

158 NSCs expressing aPKC  $\Delta$ C1 suggesting that the C1 also plays a role in regulating aPKC's  
159 protein kinase activity in NSCs. This observation is consistent with *in vitro* measurements of  
160 kinase activity (Graybill et al., 2012; Zhang et al., 2014).

161 The PS domain has been reported to be a membrane binding module required for membrane  
162 recruitment of aPKC in cultured cells and epithelia (Dong et al., 2020). Our results suggest that  
163 the PS is not sufficient for localization to the NSC membrane (e.g. aPKC PB1-PS remains in the  
164 cytoplasm). We tested whether the PS is required for NSC aPKC membrane recruitment by  
165 examining the localization of aPKC in which the positively charged, basic residues were  
166 removed and a negative charge added (aPKC AADAA). This mutation has been reported to  
167 abrogate membrane binding in contexts where the PS is required (Dong et al., 2020). We found  
168 that the apical localization of aPKC AADAA was only slightly reduced compared to WT aPKC  
169 indicating that the PS is not required for aPKC's membrane recruitment or polarization in NSCs  
170 (Figure 5B-E). Mira was cytoplasmic in NSCs expressing aPKC AADAA, however, indicating  
171 that disrupting the PS activates kinase activity, consistent with the known function of the PS in  
172 regulating catalytic activity (Graybill et al., 2012).

## 173 Discussion

174 The Par complex component aPKC undergoes a complex localization cycle in NSCs, targeting  
175 to the apical membrane in mitosis and returning to the cytoplasm as division completes (Oon  
176 and Prehoda, 2019). The function of interphase, cytoplasmic localization is unknown, but the  
177 apical localization of aPKC during mitosis is necessary for the polarization of fate determinants  
178 (Atwood et al., 2007; Prehoda, 2009; Rolls et al., 2003), a prerequisite for asymmetric cell  
179 division. Regulated membrane recruitment of aPKC is a central aspect of Par-mediated polarity  
180 and many physical interactions between aPKC and proteins and phospholipids have been  
181 identified. Conceptually, targeting could occur through the concerted action of multiple weak  
182 interactions (i.e., avidity). However, we discovered that the aPKC C1 domain is a phospholipid  
183 binding module sufficient for membrane recruitment, whereas domains that mediate protein-  
184 protein interactions or other interactions with phospholipids are not sufficient for aPKC  
185 targeting. As the C1 is the only domain within aPKC with this capability in NSCs, our results  
186 suggest that other aPKC domains, including the catalytic domain, function, at least in part, to  
187 regulate the membrane recruitment activity of the C1. We propose that cooperative activation  
188 of the C1 leads to the spatially and temporally controlled localization of aPKC observed in  
189 many animal cells.



190 The C1 is unique in its ability to promote aPKC membrane recruitment in NSCs. While  
191 numerous interactions between phospholipids and domains outside the C1 have been reported  
192 (Wang et al., 2005; Ivey et al., 2014; Kajimoto et al., 2019; Dong et al., 2020), our results  
193 indicate that they are not sufficient for membrane recruitment in NSCs. Similarly, the domains  
194 that mediate protein-protein interactions, such as the PB1 that binds Par-6 and the PBM that  
195 binds Baz, are also not sufficient for aPKC recruitment.

196 The constitutive nature of C1 membrane binding raises the question of how its activity is  
197 regulated to yield aPKC's precisely controlled localization. The aPKC catalytic domain forms  
198 intramolecular interactions with the PS and C1 that repress kinase activity (Graybill et al., 2012;  
199 Lopez-Garcia et al., 2011; Zhang et al., 2014), forming an "inhibitory core" (Figure 5F). Our  
200 results suggest the inhibitory core is coupled to C1 membrane binding. We observed C1  
201 localization at the membrane throughout the cell cycle and uniform membrane binding in  
202 mitosis when aPKC is normally restricted to the apical hemisphere. We also observed  
203 constitutive membrane recruitment in aPKC variants where the catalytic domain was  
204 perturbed, suggesting that it is required for repression of C1 activity. We suggest that  
205 perturbations to the catalytic domain that influence protein kinase activity can also disrupt the  
206 inhibitory core, consistent with the complex allosteric pathways in eukaryotic protein kinase  
207 domains (Ahuja et al., 2019). It has been proposed that the PS plays a central role in  
208 membrane recruitment and coupling localization to the inhibitory core through its interactions  
209 with the catalytic domain (Dong et al., 2020). Our results indicate that the PS is not sufficient  
210 for membrane recruitment, nor is its interaction with the aPKC catalytic domain required for  
211 polarization in NSCs (aPKC AADAA is polarized but constitutively active). We conclude that, at  
212 least in NSCs, the PS plays a more significant role in regulating catalytic activity than  
213 localization.

214 Given that the C1 appears to be autoinhibited by the catalytic domain, how might it become  
215 activated? We previously found that inactivation of the aPKC PBM (aPKC V606A), which binds  
216 Baz, leads to cytoplasmic aPKC localization (Holly et al., 2020). Taken with our current results,  
217 we suggest that the interaction with Baz is required for membrane recruitment not because  
218 Baz directly recruits aPKC (e.g. aPKC  $\Delta$ C1 is cytoplasmic), but because the Baz interaction is  
219 required for disruption of the inhibitory core and activation of the C1. Similarly, in NSCs lacking  
220 the PB1-binding Par-6 protein, aPKC also remains in the cytoplasm, even though Baz remains  
221 properly polarized and could potentially bind aPKC's PBM. We propose that cooperative



222 activation of the C1 by at least Par-6 and Baz leads to the complex localization dynamics of  
223 aPKC observed in NSCs. Future work will be directed at understanding how the aPKC PB1  
224 and PBM might be coupled to the inhibitory core and activation of aPKC membrane binding.

## 225 **Materials and Methods**

### 226 *Drosophila*

227 Flies were grown at indicated temperatures on standard cornmeal/yeast media. Both male and  
228 female larvae were used in this study. Transgenic constructs were cloned into the pUAST attB  
229 vector (GenBank: EF362409.1) modified to include an N-terminal 3xHA or 1xHA tag. Integration  
230 of the vectors was done using standard Phi-C31 integration into an attP landing site on the  
231 third chromosome (attP2) by Rainbow Genetics or BestGene Inc. Positive insertion was  
232 determined by the presence of colored eyes after backcrossing to y,w stock.

233

### 234 *Immunofluorescence*

235 For all overexpression crosses, *insc*-Gal4 virgins were crossed to males containing an aPKC  
236 transgene on the third chromosome or an RNAi on the second chromosome and an aPKC  
237 transgene on the third chromosome. Crosses laid in vials for 24 hours (~20°C) for 24 hours. The  
238 resulting embryos were incubated at 30°C until larvae reached third instar wandering larva  
239 stage. Following dissection, the tissue was incubated in 4% PFA fixative for 20' within 20' of  
240 dissection. This and all subsequent wash steps involved agitation by placing on a nutator. After  
241 fixation, brains were washed 1xquick, and 3x15' in PBST (1xPBS with 0.3% Triton-X). If brains  
242 were not to be stained that day, they would then be placed at 4°C for up to 3 days after which  
243 a quick wash in PBST would be required before moving on to staining. If instead they were to  
244 be stained, an additional wash step of 20' in PBST would occur. Brains were blocked for 30' in  
245 PBSBT (PBST with 1% BSA) and then put into 1° overnight at 4°C. The next day after removing  
246 the 1°, brains were washed 1xquick and 3x15' in PBSBT and put into 2° for 2 hours, protected  
247 from light. After 2° was removed, brains were washed 1xquick and 3x15' in PBST. Brains were  
248 stored in SlowFade w/DAPI at least overnight before imaging. Brains were imaged on an  
249 upright confocal TCS SPE from Leica using an ACS APO 40x 1.15 NA Oil CS objective.

### 250 MARCM Immunofluorescence

251 To create MARCM larval NSC clones, FRT-G13, aPKC<sup>K06403</sup>/CyO virgins were crossed with  
252 3xHA aPKC D388A males. The subsequent progeny were allowed to grow to adulthood and

253 were screened for the absence of the CyO marker. Males with no CyO were then crossed to  
254 elav-Gal4, UAS-mCD8:GFP, hs:flp; FRT-G13, tubPGal80 virgins.

255 Crosses laid in vials for 24 hours and the resulting embryos were incubated at room  
256 temperature (~20°C) for 24 hours. These vials were then heat shocked at 37°C for 90 min.  
257 Another heat shock was possible within 18 hours. Larvae were allowed to grow at room  
258 temperature or 18°C until third instar wandering larva stage, when they were dissected and  
259 fixed as above.

#### 260 *Membrane enrichment and polarization quantification*

261 Took measure of a 10px line through the central slice of a neuroblast from apical to basal  
262 cortex. Apical was taken as the peak corresponding with the apical membrane and basal was  
263 taken as the peak corresponding with the basal membrane. Where no peak was present, peaks  
264 in other channels or the “edge” of signal before it dropped was used. Cytoplasmic signal was  
265 taken as the average of 20 data points located 10 points from the apical peak.

266 All images were analyzed using Fiji and statistical analysis was done in Prism.

267 All figures were put together using Adobe Illustrator.

268

#### 269 *Lipid pulldown assay*

270 MBP-C1 was purified according to standard MBP purification protocols in our lab as previously  
271 described (Graybill et al., 2012). For Giant Unilamellar Vesical (GUV) production, 50 µl of the  
272 specified lipids at 10mg/mL in chloroform was dried in a test tube under an N<sub>2</sub> stream and then  
273 in a vacuum chamber to ensure all chloroform was removed. Lipids were resuspended in a  
274 0.2M sucrose solution to a final concentration of 0.5mg/mL and heated in a water bath at 50°C  
275 for 5 hours with occasional agitation. All lipids were stored at 4°C and used within 3 days. For  
276 this assay, 10X Dilution Buffer was made: 200mM HEPES, pH 7.5; 500mM NaCl, 10mM DTT.  
277 All spins were carried out using an Optima MAX-TL Ultracentrifuge with a TLA-100 rotor at  
278 65,000 at 4°C.

279 MBP-C1 protein was diluted to 50µM in 1xDilution Buffer and pre-cleared for 30'. Reaction  
280 conditions: 20mM HEPES, pH 7.5, 50mM NaCl, 1mM DTT, 0.25mg/mL GUVs, and 5µM MBP-  
281 C1. Reaction was carried out at room temperature for 15' and then spun down for 30'. The  
282 supernatant fraction was removed, and the pellet was resuspended in an equivalent volume of  
283 1X Dilution buffer. Both the supernatant and pellet samples were mixed with 6x loading dye

284 and run on a 12.5% SDS-Page gel. Gels were stained with Coomassie and imaged using a  
 285 scanner.

286

287 **Key Resources Table**

| Reagent type (species) or resource                 | Designation                   | Source or reference                 | Identifiers                             | Additional information                                   |
|----------------------------------------------------|-------------------------------|-------------------------------------|-----------------------------------------|----------------------------------------------------------|
| antibody                                           | anti-aPKC                     | SCBT                                | Mouse Anti-PKC zeta (H1); SC-17781      | 1:1000                                                   |
| antibody                                           | anti-Par-6                    | Alpha diagnostic                    | N/A                                     | Rat Anti-Par-6 (polyclonal custom antibody); 1:500       |
| antibody                                           | anti-Mira                     | Abcam                               | Rat Anti-Mira; Ab197788                 | 1:500                                                    |
| antibody                                           | anti-HA                       | Cell Signaling Tech.                | Rabbit Anti-HA (C29F4); 3724            | 1:1000                                                   |
| antibody                                           | anti-HA                       | Covance                             | Mouse Anti-HA; MMS-101P                 | 1:500                                                    |
| antibody                                           | anti-Baz                      | C.Q.Doe Lab                         | N/A                                     | Guinea Pig Anti-Baz (polyclonal custom antibody); 1:2000 |
| antibody                                           | anti-GFP                      | Abcam                               | Chicken Anti-GFP; Ab13970               | 1:500                                                    |
| antibody                                           | anti-rat Cy3 secondary        | Jackson ImmunoResearch Lab.         | Donkey Anti-Rat Cy3; 712-165-153        | 1:500                                                    |
| antibody                                           | anti-rabbit 647 secondary     | Jackson ImmunoResearch Lab.         | Donkey Anti-Rabbit 647; 711-605-152     | 1:500                                                    |
| antibody                                           | anti-mouse 647 secondary      | Jackson ImmunoResearch Lab.         | Donkey Anti-Mouse 647; 715-605-151      | 1:500                                                    |
| antibody                                           | anti-mouse 488 secondary      | Jackson ImmunoResearch Lab.         | Donkey Anti-Mouse 488; 715-545-151      | 1:500                                                    |
| antibody                                           | anti-chicken 488 secondary    | Jackson ImmunoResearch Lab.         | Donkey Anti-Chicken 488; 703-545-155    | 1:500                                                    |
| antibody                                           | anti-guinea pig 405 secondary | Jackson ImmunoResearch Lab.         | Donkey Anti-Guinea Pig 405; 706-475-148 | 1:500                                                    |
| genetic reagent ( <i>Drosophila melanogaster</i> ) | <i>insc-GAL4</i>              | Bloomington Drosophila Stock Center | <i>insc-GAL4</i>                        | RRID:BDSC_8751                                           |

|                                                       |                                              |                                     |                                                                |                  |
|-------------------------------------------------------|----------------------------------------------|-------------------------------------|----------------------------------------------------------------|------------------|
| genetic reagent<br>( <i>Drosophila melanogaster</i> ) | <i>elav-GAL4</i>                             | Bloomington Drosophila Stock Center | <i>elav-Gal4, UAS-mCD8:GFP, hs:flp; FRT-G13, tubPGal80</i>     | RRID:BDSC_5145   |
| genetic reagent<br>( <i>Drosophila melanogaster</i> ) | <i>aPKC<sup>K06403</sup></i>                 | C.Q. Doe Lab                        | <i>; FRT-G13, aPKCK<sup>06403</sup>/CyO</i>                    |                  |
| genetic reagent<br>( <i>Drosophila melanogaster</i> ) | HA-aPKC D388A                                | This study                          | <i>;;3xHA-aPKC D388A (aPKC-PA)</i>                             |                  |
| genetic reagent<br>( <i>Drosophila melanogaster</i> ) | HA-aPKC D388A                                | This study                          | <i>;;1xHA-aPKC D388A (aPKC-PA)</i>                             |                  |
| genetic reagent<br>( <i>Drosophila melanogaster</i> ) | HA-aPKC                                      | This study                          | <i>;;1xHA-aPKC 1-606 (aPKC-PA)</i>                             |                  |
| genetic reagent<br>( <i>Drosophila melanogaster</i> ) | aPKC K293W                                   | This study                          | <i>;;1xHA-aPKC K293W (aPKC-PA)</i>                             |                  |
| genetic reagent<br>( <i>Drosophila melanogaster</i> ) | aPKC PB1-C1                                  | This study                          | <i>;;1xHA-aPKC 1-195 (aPKC-PA)</i>                             |                  |
| genetic reagent<br>( <i>Drosophila melanogaster</i> ) | aPKC PB1-PS                                  | This study                          | <i>;;1xHA-aPKC 1-141 (aPKC-PA)</i>                             |                  |
| genetic reagent<br>( <i>Drosophila melanogaster</i> ) | aPKC C1                                      | This study                          | <i>;;1xHA-aPKC 139-195 (aPKC-PA)</i>                           |                  |
| genetic reagent<br>( <i>Drosophila melanogaster</i> ) | aPKC ΔC1                                     | This study                          | <i>;;1xHA-aPKC 1-606 Δ141-196 (aPKC-PA)</i>                    |                  |
| genetic reagent<br>( <i>Drosophila melanogaster</i> ) | aPKC AADAA                                   | This study                          | <i>;;1xHA-aPKC R131A, R132A, A134D, R135A, R136A (aPKC-PA)</i> |                  |
| genetic reagent<br>( <i>Drosophila melanogaster</i> ) | Baz RNAi                                     | Bloomington Drosophila Stock Center | <i>;UAS-Baz RNAi</i>                                           | RRID:BDSC_39072  |
| genetic reagent<br>( <i>Drosophila melanogaster</i> ) | Cdc42 RNAi                                   | Bloomington Drosophila Stock Center | <i>;UAS-Cdc42 RNAi</i>                                         | RRID:VDRC_100794 |
| chemical compound, drug                               | Amylose Resin                                | NEB                                 | E8021L                                                         |                  |
| chemical compound, drug                               | Schneider's Insect Medium (SIM)              | Sigma                               | S0146                                                          |                  |
| chemical compound, drug                               | SlowFade Diamond Antifade Mountant with DAPI | Invitrogen                          | S36964                                                         |                  |

|                         |                           |                     |                                            |  |
|-------------------------|---------------------------|---------------------|--------------------------------------------|--|
| chemical compound, drug | Phosphatidylserine (PS)   | Avanti Polar Lipids | L- $\alpha$ -phosphatidylserine; 840032C   |  |
| chemical compound, drug | Phosphatidylcholine (PC)  | Avanti Polar Lipids | L- $\alpha$ -phosphatidylcholine; 840051C  |  |
| chemical compound, drug | Phosphatidic acid (PA)    | Avanti Polar Lipids | L- $\alpha$ -phosphatidic acid; 840101C    |  |
| chemical compound, drug | Phosphatidylglycerol (PG) | Avanti Polar Lipids | L- $\alpha$ -phosphatidylglycerol; 841138P |  |
| chemical compound, drug | ceramide                  | Avanti Polar Lipids | C12 ceramide; 860512P                      |  |

288

## 289 References

- 290 Ahuja LG, Taylor SS, Kornev AP. 2019. Tuning the “violin” of protein kinases: The role of  
291 dynamics-based allostery. *IUBMB Life* **71**:685–696. doi:10.1002/iub.2057
- 292 Atwood SX, Chabu C, Penkert RR, Doe CQ, Prehoda KE. 2007. Cdc42 acts downstream of  
293 Bazooka to regulate neuroblast polarity through Par-6 aPKC. *J Cell Sci* **120**:3200–3206.  
294 doi:10.1242/jcs.014902
- 295 Atwood SX, Prehoda KE. 2009. aPKC phosphorylates Miranda to polarize fate determinants  
296 during neuroblast asymmetric cell division. *Curr Biol CB* **19**:723–729.  
297 doi:10.1016/j.cub.2009.03.056
- 298 Bailey MJ, Prehoda KE. 2015. Establishment of Par-Polarized Cortical Domains via  
299 Phosphoregulated Membrane Motifs. *Dev Cell* **35**:199–210.  
300 doi:10.1016/j.devcel.2015.09.016
- 301 Colón-González F, Kazanietz MG. 2006. C1 domains exposed: from diacylglycerol binding to  
302 protein-protein interactions. *Biochim Biophys Acta* **1761**:827–837.  
303 doi:10.1016/j.bbalip.2006.05.001
- 304 Dong W, Lu J, Zhang X, Wu Y, Lettieri K, Hammond GR, Hong Y. 2020. A polybasic domain in  
305 aPKC mediates Par6-dependent control of membrane targeting and kinase activity. *J*  
306 *Cell Biol* **219**:e201903031. doi:10.1083/jcb.201903031
- 307 Graybill C, Wee B, Atwood SX, Prehoda KE. 2012. Partitioning-defective protein 6 (Par-6)  
308 activates atypical protein kinase C (aPKC) by pseudosubstrate displacement. *J Biol*  
309 *Chem* **287**:21003–21011. doi:10.1074/jbc.M112.360495
- 310 Hannaford M, Loyer N, Tonelli F, Zoltner M, Januschke J. 2019. A chemical-genetics approach  
311 to study the role of atypical Protein Kinase C in *Drosophila*. *Dev Camb Engl*  
312 **146**:dev170589. doi:10.1242/dev.170589
- 313 Holly RW, Jones K, Prehoda KE. 2020. A Conserved PDZ-Binding Motif in aPKC Interacts with  
314 Par-3 and Mediates Cortical Polarity. *Curr Biol CB* **30**:893-898.e5.  
315 doi:10.1016/j.cub.2019.12.055
- 316 Homem CCF, Knoblich JA. 2012. *Drosophila* neuroblasts: a model for stem cell biology  
317 **139**:4297–4310. doi:10.1242/dev.080515
- 318 Ikeshima-Kataoka H, Skeath JB, Nabeshima Y, Doe CQ, Matsuzaki F. 1997. Miranda directs  
319 Prospero to a daughter cell during *Drosophila* asymmetric divisions. *Nature* **390**:625–  
320 629. doi:10.1038/37641

- 321 Ivey RA, Sajan MP, Farese RV. 2014. Requirements for pseudosubstrate arginine residues  
322 during autoinhibition and phosphatidylinositol 3,4,5-(PO<sub>4</sub>)<sub>3</sub>-dependent activation of  
323 atypical PKC. *J Biol Chem* **289**:25021–25030. doi:10.1074/jbc.M114.565671
- 324 Joberty G, Petersen C, Gao L, Macara IG. 2000. The cell-polarity protein Par6 links Par3 and  
325 atypical protein kinase C to Cdc42. *Nat Cell Biol* **2**:531–539. doi:10.1038/35019573
- 326 Kajimoto T, Caliman AD, Tobias IS, Okada T, Pilo CA, Van A-AN, Andrew McCammon J,  
327 Nakamura S-I, Newton AC. 2019. Activation of atypical protein kinase C by sphingosine  
328 1-phosphate revealed by an aPKC-specific activity reporter. *Sci Signal* **12**:eaat6662.  
329 doi:10.1126/scisignal.aat6662
- 330 Krahn MP, Klopfenstein DR, Fischer N, Wodarz A. 2010. Membrane targeting of Bazooka/PAR-  
331 3 is mediated by direct binding to phosphoinositide lipids. *Curr Biol CB* **20**:636–642.  
332 doi:10.1016/j.cub.2010.01.065
- 333 Lang CF, Munro E. 2017. The PAR proteins: from molecular circuits to dynamic self-stabilizing  
334 cell polarity. *Dev Camb Engl* **144**:3405–3416. doi:10.1242/dev.139063
- 335 Lin D, Edwards AS, Fawcett JP, Mbamalu G, Scott JD, Pawson T. 2000. A mammalian PAR-3-  
336 PAR-6 complex implicated in Cdc42/Rac1 and aPKC signalling and cell polarity. *Nat*  
337 *Cell Biol* **2**:540–547. doi:10.1038/35019582
- 338 Lopez-Garcia LA, Schulze JO, Fröhner W, Zhang H, Süss E, Weber N, Navratil J, Amon S,  
339 Hindie V, Zeuzem S, Jørgensen TJD, Alzari PM, Neimanis S, Engel M, Biondi RM. 2011.  
340 Allosteric regulation of protein kinase PKCζ by the N-terminal C1 domain and small  
341 compounds to the PIF-pocket. *Chem Biol* **18**:1463–1473.  
342 doi:10.1016/j.chembiol.2011.08.010
- 343 Nance J, Zallen JA. 2011. Elaborating polarity: PAR proteins and the cytoskeleton. *Dev Camb*  
344 *Engl* **138**:799–809. doi:10.1242/dev.053538
- 345 Oon CH, Prehoda KE. 2019. Asymmetric recruitment and actin-dependent cortical flows drive  
346 the neuroblast polarity cycle. *eLife* **8**. doi:10.7554/eLife.45815
- 347 Petronczki M, Knoblich JA. 2001. DmPAR-6 directs epithelial polarity and asymmetric cell  
348 division of neuroblasts in *Drosophila*. *Nat Cell Biol* **3**:43–49. doi:10.1038/35050550
- 349 Prehoda KE. 2009. Polarization of *Drosophila* neuroblasts during asymmetric division. *Cold*  
350 *Spring Harb Perspect Biol* **1**:a001388. doi:10.1101/cshperspect.a001388
- 351 Rodriguez J, Peglion F, Martin J, Hubatsch L, Reich J, Hirani N, Gubieda AG, Roffey J,  
352 Fernandes AR, St Johnston D, Ahringer J, Goehring NW. 2017. aPKC Cycles between  
353 Functionally Distinct PAR Protein Assemblies to Drive Cell Polarity. *Dev Cell* **42**:400-  
354 415.e9. doi:10.1016/j.devcel.2017.07.007
- 355 Rolls MM, Albertson R, Shih H-P, Lee C-Y, Doe CQ. 2003. *Drosophila* aPKC regulates cell  
356 polarity and cell proliferation in neuroblasts and epithelia. *J Cell Biol* **163**:1089–1098.  
357 doi:10.1083/jcb.200306079
- 358 Smith CA, Lau KM, Rahmani Z, Dho SE, Brothers G, She YM, Berry DM, Bonneil E, Thibault P,  
359 Schweisguth F, Le Borgne R, McGlade CJ. 2007. aPKC-mediated phosphorylation  
360 regulates asymmetric membrane localization of the cell fate determinant Numb. *EMBO*  
361 *J* **26**:468–480. doi:10.1038/sj.emboj.7601495
- 362 Standaert ML, Galloway L, Karnam P, Bandyopadhyay G, Moscat J, Farese RV. 1997. Protein  
363 kinase C-zeta as a downstream effector of phosphatidylinositol 3-kinase during insulin  
364 stimulation in rat adipocytes. Potential role in glucose transport **272**:30075–30082.
- 365 Tepass U. 2012. The Apical Polarity Protein Network in *Drosophila* Epithelial Cells: Regulation  
366 of Polarity, Junctions, Morphogenesis, Cell Growth, and Survival **28**:655–685.  
367 doi:10.1146/annurev-cellbio-092910-154033



- 368 Venkei ZG, Yamashita YM. 2018. Emerging mechanisms of asymmetric stem cell division. *J*  
369 *Cell Biol.* doi:10.1083/jcb.201807037
- 370 Wang G, Silva J, Krishnamurthy K, Tran E, Condie BG, Bieberich E. 2005. Direct binding to  
371 ceramide activates protein kinase Czeta before the formation of a pro-apoptotic  
372 complex with PAR-4 in differentiating stem cells. *J Biol Chem* **280**:26415–26424.  
373 doi:10.1074/jbc.M501492200
- 374 Wodarz A, Ramrath A, Grimm A, Knust E. 2000. Drosophila atypical protein kinase C  
375 associates with Bazooka and controls polarity of epithelia and neuroblasts. *J Cell Biol*  
376 **150**:1361–1374. doi:10.1083/jcb.150.6.1361
- 377 Zhang H, Neimanis S, Lopez-Garcia LA, Arencibia JM, Amon S, Stroba A, Zeuzem S, Proschak  
378 E, Stark H, Bauer AF, Busschots K, Jørgensen TJD, Engel M, Schulze JO, Biondi RM.  
379 2014. Molecular mechanism of regulation of the atypical protein kinase C by N-terminal  
380 domains and an allosteric small compound. *Chem Biol* **21**:754–765.  
381 doi:10.1016/j.chembiol.2014.04.007  
382



Figure 1

Jones, Drummond, and Prehoda

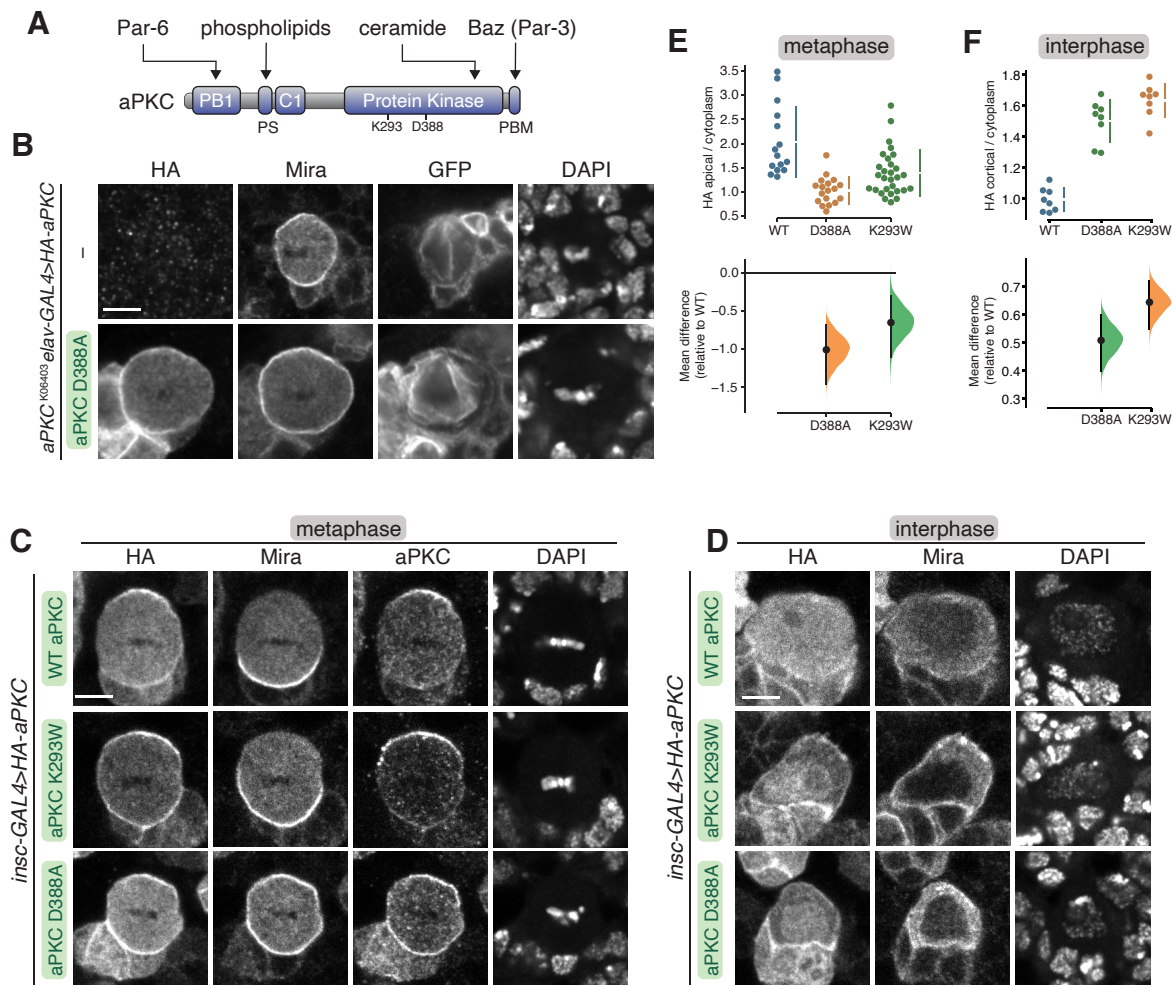

**Figure 1 Localization of aPKC with kinase inactivating mutations in larval brain NSCs**

**(A)** Domain structure of aPKC showing the location of PB1, PS (pseudosubstrate), C1, kinase domains, PBM (PDZ binding motif), along with location of K293 and D388 residues.

**(B)** Localization of HA tagged aPKC harboring the D388A kinase inactivating mutation in a metaphase, positively marked (mCD8-GFP) *aPKC*<sup>K06403</sup> mutant larval brain NSC. Expression of D388A was driven by UAS and *elav-GAL4*. An *aPKC*<sup>K06403</sup> mutant larval brain NSC is shown for comparison. Nucleic acids are shown with DAPI. Scale bar is 5  $\mu$ m in all panels.

**(C)** Localization of HA tagged aPKC harboring either the D388A or K293W kinase inactivation mutations in metaphase larval brain NSCs with endogenous aPKC. The basal cortical marker Miranda, total aPKC ("aPKC", endogenous and exogenously expressed), and nucleic acid (DAPI) are also shown.

**(D)** Localization of HA tagged aPKC harboring either the D388A or K293W kinase inactivation mutations in interphase larval brain NSCs with endogenous aPKC. The basal cortical marker Miranda and nucleic acid (DAPI) are also shown.

**(E)** Gardner-Altman estimation plot of the effect of the D388A and K293W mutations on metaphase aPKC membrane recruitment. Apical cortical to cytoplasmic signal intensities of anti-HA signals are shown for individual metaphase NSCs expressing either HA-WT or HA-D388A or HA-K293W aPKC. Statistics: bootstrap 95% confidence interval (bar in "D388A" and "K293W" column).

**(F)** Gardner-Altman estimation plot of the effect of the D388A and K293W mutations on interphase aPKC membrane recruitment. Cortical to cytoplasmic cortical signal intensities of anti-HA signals are shown for individual metaphase NSCs expressing either HA-WT or HA-D388A or HA-K293W aPKC. Statistics: bootstrap 95% confidence interval (bar in "D388A" and "K293W" column).

Figure 2

Jones, Drummond, and Prehoda

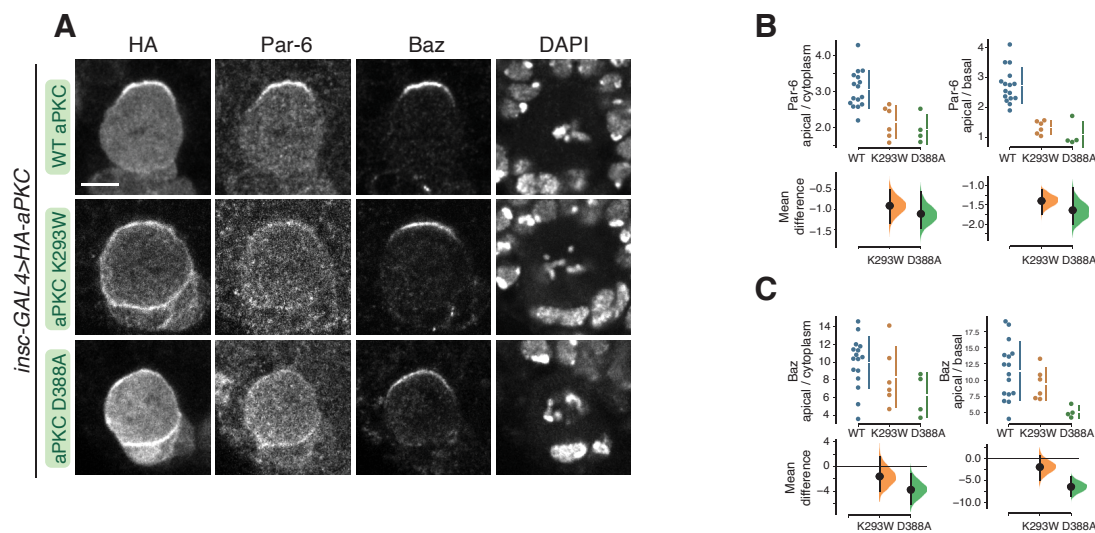

**Figure 2 Localization of Bazooka and Par-6 in larval brain NSCs expressing kinase inactive aPKCs**

**(A)** Localization of Par-6 and Bazooka (Baz) in metaphase larval brain NSCs expressing HA tagged aPKC D388A or aPKC K293W via UAS and *insc-GAL4*. Nucleic acids are shown with DAPI. Scale bar is 5  $\mu$ m.

**(B)** Gardner-Altman estimation plots of the effect of expressing aPKC D388A or aPKC K293W on Par-6 cortical localization and polarity. Apical cortical to cytoplasmic or basal cortical signal intensities of anti-Par-6 signals are shown for individual metaphase NSCs expressing either HA-WT or HA-D388A or HA-K293W aPKC. Statistics: bootstrap 95% confidence interval (bar in “D388A” and “K293W” column).

**(C)** Gardner-Altman estimation plots of the effect of expressing aPKC D388A or aPKC K293W on Baz cortical localization and polarity. Apical cortical to cytoplasmic or basal cortical signal intensities of anti-Baz signals are shown for individual metaphase NSCs expressing either HA-WT or HA-D388A or HA-K293W aPKC. Statistics: bootstrap 95% confidence interval (bar in “D388A” and “K293W” column).

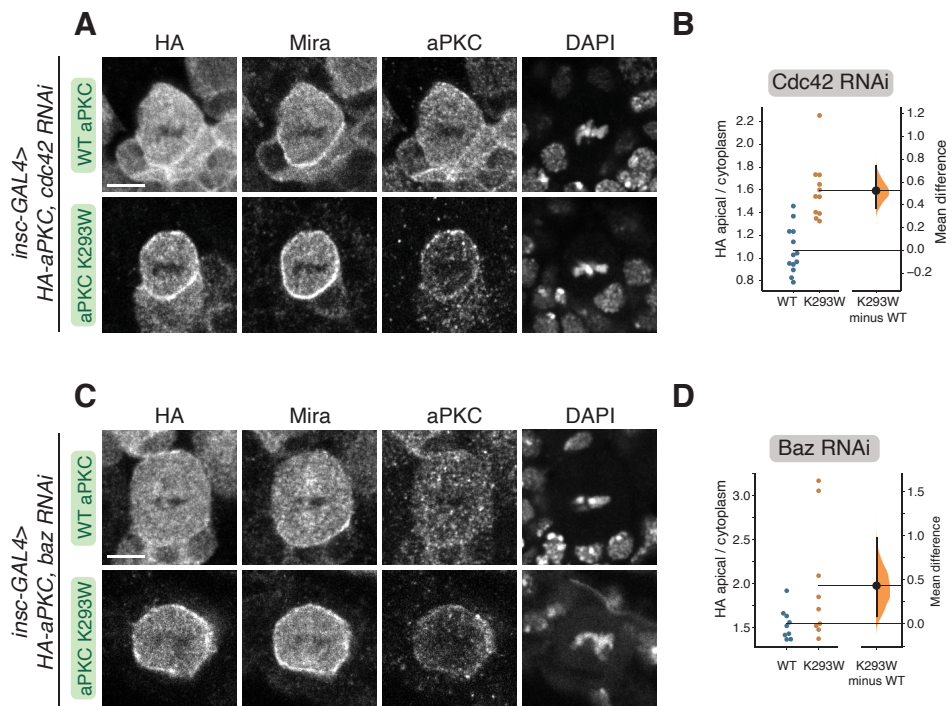

**Figure 3 Cortical localization of kinase inactive aPKC in NSCs lacking Bazooka or Cdc42**

**(A)** Localization of HA tagged aPKC K293W in metaphase larval brain NSCs expressing an RNAi directed against Cdc42. Scale bar is 5  $\mu$ m in all panels.

**(B)** Gardner-Altman estimation plots of the effect of expressing Cdc42 RNAi on WT and K293W aPKC cortical localization. Apical cortical to cytoplasmic signal intensities of anti-HA signals are shown for individual metaphase NSCs expressing either HA-WT or HA-K293W aPKC. Statistics: bootstrap 95% confidence interval.

**(C)** Localization of HA tagged aPKC K293W in metaphase larval brain NSCs expressing an RNAi directed against Bazooka.

**(D)** Gardner-Altman estimation plots of the effect of expressing Baz RNAi on WT and K293W aPKC cortical localization. Apical cortical to cytoplasmic signal intensities of anti-HA signals are shown for individual metaphase NSCs expressing either HA-WT or HA-K293W aPKC. Statistics: bootstrap 95% confidence interval.

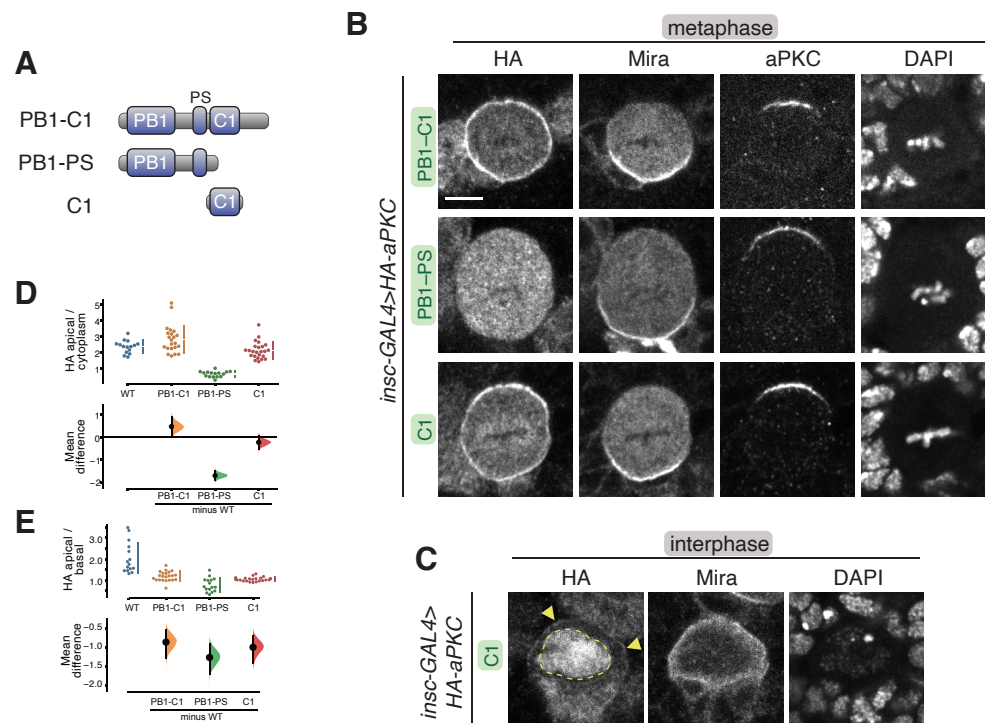

#### Figure 4 Localization of the aPKC regulatory domain variants in larval brain NSCs

**(A)** Schematics of regulatory domain variants of aPKC.

**(B)** Localization of HA tagged aPKC regulatory domain variants in metaphase larval brain NSCs. The basal marker Miranda, endogenous aPKC (using an antibody that does not react with the regulatory domain), nucleic acids (DAPI) are shown for comparison. Scale bar is 5  $\mu$ m.

**(C)** Localization of the HA tagged aPKC C1 domain in interphase larval brain NSCs. Arrowheads highlight the membrane signal and the nuclear signal is outlined by a dashed line.

**(D)** Gardner-Altman estimation plot of aPKC regulatory domain cortical localization. Apical cortical to cytoplasmic signal intensity ratios of anti-HA signals are shown for individual metaphase NSCs expressing either aPKC PB1-C1 or PB1-PS or C1 regulatory domain fragments. Statistics: bootstrap 95% confidence interval.

**(E)** Gardner-Altman estimation plot of aPKC regulatory domain polarity. Apical cortical to basal cortical signal intensity ratios of anti-HA signals are shown for individual metaphase NSCs expressing either aPKC PB1-C1 or PB1-PS or C1 regulatory domain fragments. Statistics: bootstrap 95% confidence interval.



Figure 5

Jones, Drummond, and Prehoda

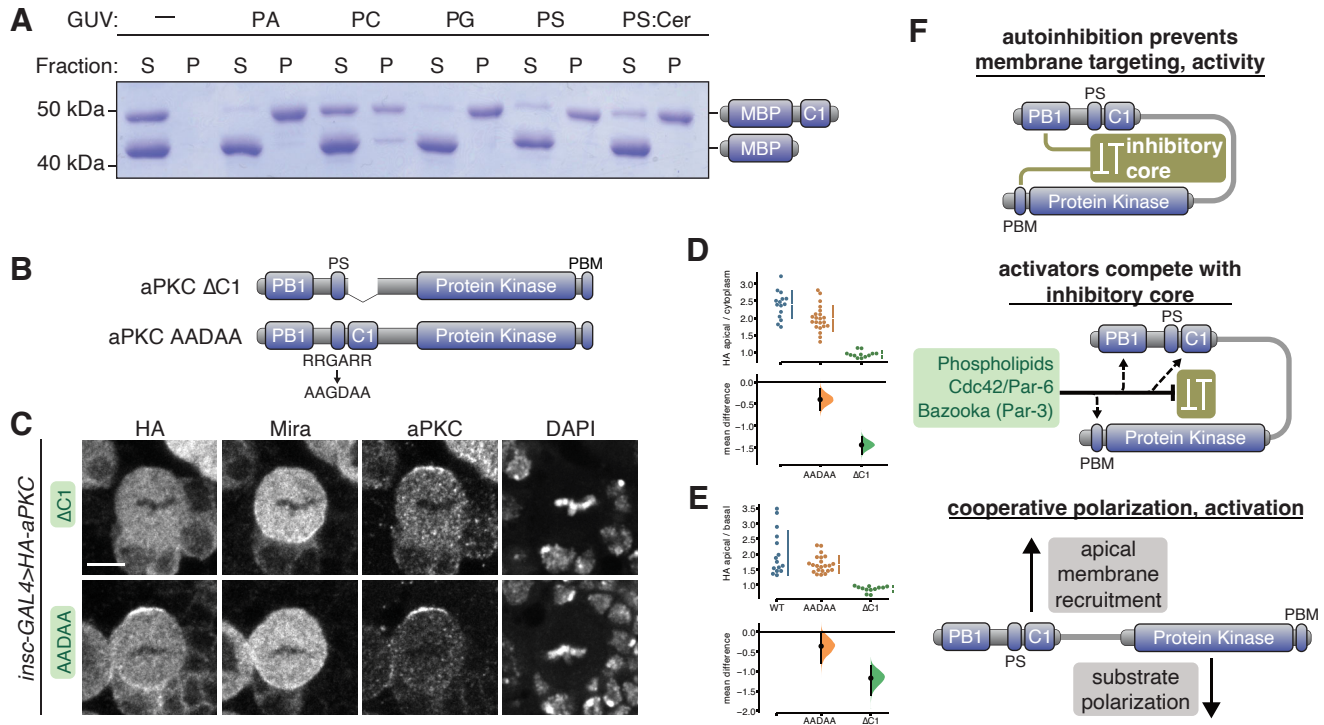

**Figure 5 The aPKC C1 domain is a cortical localization module that is required for aPKC polarity**

**(A)** Binding of a maltose binding protein (MBP) fusion of the aPKC C1 domain to phospholipids. Supernatant (S) and pellet (P) fractions from cosedimentation with Giant Unilamellar Vesicles (GUVs) of the indicated phospholipid composition are shown (PA, phosphatidic acid; PC, phosphatidyl choline; PG, phosphatidyl glycerol; PS, phosphatidyl serine; PS: Cer, phosphatidyl serine mixture with ceramide). MBP alone is included as an internal negative control.

**(B)** Schematics of  $\Delta$ C1 and AADAA aPKC variants.

**(C)** Localization of HA tagged aPKC  $\Delta$ C1 and AADAA variants in metaphase larval brain NSCs. The basal marker Miranda, total aPKC (expressed variant and endogenous), nucleic acids (DAPI) are shown for comparison. Scale bar is 5  $\mu$ m.

**(D)** Gardner-Altman estimation plot of aPKC AADAA and  $\Delta$ C1 cortical localization. Apical cortical to cytoplasmic signal intensity ratios of anti-HA signals are shown for individual metaphase NSCs expressing either aPKC AADAA or  $\Delta$ C1. Statistics: bootstrap 95% confidence interval.

**(E)** Gardner-Altman estimation plot of aPKC AADAA and  $\Delta$ C1 polarization. Apical cortical to basal cortical signal intensity ratios of anti-HA signals are shown for individual metaphase NSCs expressing either aPKC AADAA or  $\Delta$ C1. Statistics: bootstrap 95% confidence interval.

**(F)** Model for cooperative polarization and activation of aPKC. An inhibitory core couples repression of catalytic activity (protein kinase domain) to membrane localization (C1 with some contribution from PS). The PB1 and PBM are also coupled to the inhibitory core to allow for cooperative activation by Cdc42/Par-6 binding to the PB1 and Baz binding to the PBM. Disruption of the inhibitory core leads to spatially (apical) and temporally (mitotic) regulated localization and activation of catalytic activity.
